# 1 **Addressing dereplication crisis: Taxonomy-free reduction of massive genome collections using embed-** 2 **dings of protein content**

3 A. Viehweger<sup>1,2,4</sup>, M. Hoelzer<sup>1,4</sup>, C. Brandt<sup>3,4</sup>

- 4 1. RNA Bioinformatics and High-Throughput Analysis, Faculty of Mathematics and Computer Science, Friedrich Schiller  
5 University Jena, 07743 Jena  
6 2. Institute of Medical Microbiology, University Hospital Leipzig, 04103 Leipzig  
7 3. Institute for Infectious Diseases, University Hospital Jena, 07747 Jena  
8 4. nanozoo GmbH, 04107 Leipzig

9 Corresponding author: [adrian.viehweger@uni-jena.de](mailto:adrian.viehweger@uni-jena.de)

## 10 **Abstract**

11 Many recent microbial genome collections curate hundreds of thousands of genomes. This volume complicates  
12 many genomic analyses such as taxon assignment because the associated computational burden is substantial.  
13 However, the number of representatives of each species is highly skewed towards human pathogens and model  
14 organisms. Thus many genomes contain little additional information and could be removed. We created a frugal  
15 dereplication method that can reduce massive genome collections based on genome sequence alone, without the  
16 need for manual curation nor taxonomic information.

17 We recently created a genome representation for bacteria and archaea called “nanotext”. This method embeds each  
18 genome in a low-dimensional vector of numbers. Extending nanotext, our proposed algorithm called “thinspace”  
19 uses these vectors to group and dereplicate similar genomes.

20 We dereplicated the Genome Taxonomy Database (GTDB) from about 150 thousand genomes to less than 22  
21 thousand. The resulting collection increases the percent of classified reads in a metagenomic dataset by a factor  
22 of 5 compared to NCBI RefSeq and performs equal to both a larger as well as a manually curated GTDB subset.

23 With thinspace, massive genome collections can be dereplicated on regular hardware, without affecting downstream  
24 results. It is released under a BSD-3 license ([github.com/phiweger/thinspace](https://github.com/phiweger/thinspace)).

## 25 Introduction

26 New microbial genome collections curate hundreds of thousands of genomes.<sup>1-3</sup> However, many organisms tend  
27 to be overrepresented.<sup>4</sup> For example, 9.5% of genomes in the Genome Taxonomy Database (GTDB)<sup>3</sup> belong to *E.*  
28 *coli*. This redundancy complicates downstream analyses. For example, to assign reads to taxa, a k-mer index is  
29 required,<sup>5</sup> and this index can only be computed on a large compute cluster for genome collections of even moderate  
30 size. One way to approach this problem is to dereplicate the collection, i.e., to remove copies of similar genomes.<sup>6,7</sup>  
31 Two genomes are typically considered similar if their average nucleotide identity (ANI) is above some threshold,  
32 such as 0.95 at the species level.<sup>8</sup> However, to compare each genome with all others in the collection scales  
33 quadratically with the size of the collection. We recently proposed “nanotext”, a method to represent genomes  
34 based on their protein domains, just like documents can be represented by the words they contain.<sup>9</sup> Each genome  
35 is represented as an “embedding”, an n-dimensional vector of numbers. These vectors can be used as direct input  
36 to many dimensionality reduction and clustering algorithms. Here we propose “thinspace”, an algorithm that can  
37 dereplicate vast collections with millions of genomes on standard hardware without affecting task performance on  
38 read-based taxon assignment.

## 39 Results

40 We dereplicated the entire GTDB with 150 thousand genomes down to 20 thousand (7.5%) on a regular laptop in  
41 under a day using a new dereplication algorithm called “thinspace”. The algorithm starts from a collection of genome  
42 sequences and precomputed embeddings. Each embedding is a latent representation of a genome’s protein con-  
43 tent in a 100-dimensional vector of numbers.<sup>9</sup> The algorithm returns the dereplicated input collection. Thinspace  
44 uses a divide-and-conquer approach and proceeds in two main steps. First, genome vectors are grouped using an  
45 unsupervised, density-based clustering method, where similar genomes – i.e., genomes with overlapping protein  
46 content – end up in the same cluster. Because genomes are represented in few dimensions, this clustering scales  
47 to potentially billions of data points.<sup>10,11</sup> Second, within each cluster, pairwise nucleotide distances are computed  
48 for each genome against all others. The resulting distance matrix describes a graph, where an edge connects  
49 two vertices (genomes) if their pairwise ANI exceeds 0.95, a threshold commonly applied to discern species-level  
50 groups.<sup>8,12</sup> For each connected component of this graph, the genome with the largest N50 is chosen as represen-

51 tative in the resulting, dereplicated collection. Large clusters are a resource constraint (e.g. a single cluster with  
52 13,876 members of *E. coli* in the GTDB). Therefore, clusters that contain more than 500 genomes are processed  
53 in batches and iteratively recombined until a stable number of representatives is found. The entire cycle is re-  
54 peated twice to increase the number of dereplicated genomes (25% reduction in the second iteration, less than 5%  
55 thereafter).

56 Dereplication efficiency is dependent on the quality of the clustering of similar genomes during the first step of  
57 the thinspace algorithm. The identified clusters contain homogenous taxa, and taxa rarely spread across cluster  
58 boundaries. We quantified this at the species (genus) level, with a *Rand* score of 0.65 (0.71) and a *mutual infor-*  
59 *mation* score of 0.76 (0.80), where 0 indicates a random allocation of point labels to clusters and 1 means perfect  
60 separation.

61 We validated our approach on a metagenomic read classification task for 20 recently sequenced biogas samples,  
62 comparing the collection of dereplicated genomes from thinspace (n=21,798) against a manually created, high-  
63 quality subset of genomes from the GTDB (n=24,706), hereafter called “GTDB 25k”.<sup>4</sup> Both approaches perform  
64 near-identical on this task with the same percentage of long reads classified (GTDB 25k: 39.2% ± 13.6%, thinspace:  
65 39.4% ± 13.7%, Figure 1), and they slightly underperform a much larger collection of GTDB genomes (n=54,000,  
66 40.9% ± 14.2%, p=1, Bonferroni-corrected ANOVA).<sup>13</sup> The classification based on the NCBI RefSeq collection  
67 retrieves only about one fifth of those taxonomic hits (8.5% ± 9%, p<0.001, Bonferroni-corrected ANOVA). For short  
68 reads, these results are replicable, with a larger classification variance due to less information per read (Figure 1).

69 We compared the performance of thinspace to the current standard dereplication technique of all-vs-all distance  
70 computation. Popular examples include dRep,<sup>6</sup> which estimates the (nucleotide) distance between genomes with  
71 an efficient k-mer based method called Mash,<sup>14</sup> as does our algorithm at the cluster level. For performance, there  
72 are two main considerations: First, the amount of memory required to store a genome (representation) limits the  
73 number of genomes that can be compared simultaneously to one another. Second, the number of pairwise com-  
74 parisons determines the number of CPU hours required for the distance computations.

75 Thinspace uses the nanotext genome representation of a genome as a vector of numbers<sup>9</sup> and requires 2 KB per  
76 genome (for a vector of 100 dimensions with floating-point numbers). Mash requires at least five times more to  
77 represent a genome, with about 10 KB for 1,000 32-bit hash integers, depending on the “sketch size”<sup>14</sup> (Table

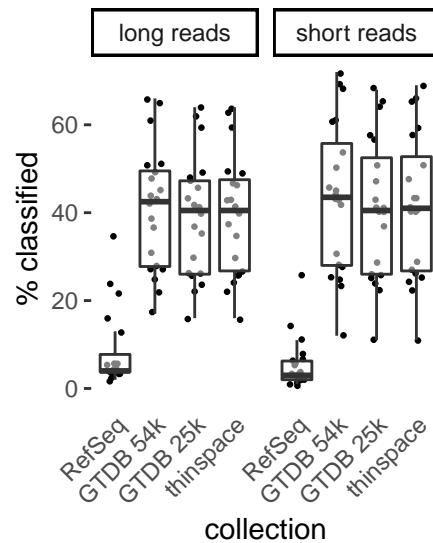

Figure 1: Performance of indices used in taxonomic read classification and built from different collections of genomes: NCBI RefSeq, the Genome Taxonomy Database (“GTDB 54k”), a manual dereplication of the GTDB (“GTDB 25k”)<sup>4</sup> and the dereplicated collection created using thinspace. Performance was assessed on short (Illumina) and long (Nanopore) reads generated from 20 metagenomic biogas samples. As has been observed previously,<sup>13</sup> all GTDB-based collections increase the number of classified reads dramatically compared to NCBI RefSeq ( $p < 0.001$ ). Results are similar for long and short reads. Surprisingly, when one reduces the number of reference genomes to about one representative genome per species, the percentage of reads classified does not decrease significantly, neither by manual (“GTDB 25k”<sup>4</sup>) nor automatic curation (thinspace).

78 1). To compare each genome in the GTDB to all others, 10.63 billion distance calculations in 48.19 CPU hours  
79 are needed. The divide-and-conquer approach of thinspace reduces this to 0.41 billion comparisons in 1.86 CPU  
80 hours (3.85%, Table 1). The hashing of all genomes by Mash is required in both approaches.

Table 1: Required resources for genome dereplication of the entire Genome Taxonomy Database (GTDB, about 150 thousand genomes). Compared are an all-vs-all k-mer based approach (Mash, using *MinHash* genome sketches)<sup>14</sup> and the thinspace algorithm, which relies on nanotext genome embeddings.<sup>9</sup> The latter drastically reduces the required resources and can thus scale to far larger collections with millions of genomes.

| metric                    | unit      | all-vs-all | thinspace   |
|---------------------------|-----------|------------|-------------|
| memory per genome         | kilobyte  | >10        | <b>2</b>    |
| calculate distance matrix | CPU hours | 48.19      | <b>1.86</b> |
| number of comparisons     | billion   | 10.63      | <b>0.41</b> |

## 81 Discussion

82 Microbial genome collections are growing towards a million genomes and beyond. Using these vast collections in  
83 downstream tasks is often impossible, due to the equally large compute resources required. We solve this problem  
84 by first representing genomes as vectors of numbers, and then clustering and dereplicating them in a divide-and-  
85 conquer strategy, which reduces the computational requirements dramatically. Common “batch” strategies, in which  
86 the genome collection is randomly split into subsets,<sup>2</sup> are avoided. Our algorithm does not require a priori taxonomic  
87 knowledge of the input genomes. The result performs equally well compared to manual dereplication on a common  
88 classification task.

89 Thinspace performs two computations that the all-vs-all method does not: First, each genome needs a protein  
90 domain annotation, and all annotations are used to train the nanotext genome model.<sup>9</sup> Second, the genome em-  
91 beddings have to be clustered. Thinspace uses the HDBSCAN algorithm, which scales to billions of data points.<sup>10,11</sup>  
92 The clustering performance can be further augmented by first reducing the dimensions of the embedding vectors,  
93 for which thinspace provides an option using the UMAP algorithm.<sup>15</sup> This upfront cost has advantages compared  
94 to an approach purely based on nucleotide distance: Nanotext vectors can correctly represent even incomplete

95 genomes,<sup>9</sup> which Mash cannot.<sup>6</sup> Also unlike Mash, nanotext can reliably calculate pairwise genome distances be-  
96 low an ANI of 0.8.<sup>9,14</sup> In conclusion, thinspace can dereplicate millions of even incomplete genomes over large  
97 distances on standard hardware in a reasonable time.

## 98 **Methods**

99 For genome embeddings, we used the nanotext library (v0.1, [github.com/phiweger/nanotext](https://github.com/phiweger/nanotext)) with the “core” model  
100 which emphasises core genes for genome comparison. The resulting vectors of numbers were clustered using  
101 HDBSCAN.<sup>15</sup> To assess the quality of the clustering, we use the *Rand* score (adjusted)<sup>16</sup> and the *mutual information*  
102 score (adjusted)<sup>17</sup> as implemented in the sklearn library (v0.21.3, [scikit-learn.org](https://scikit-learn.org)). Clusters were dereplicated using  
103 custom scripts developed by Ryan Wick ([github.com/rrwick/Assembly-Dereplicator](https://github.com/rrwick/Assembly-Dereplicator)) as was the reformatting of the  
104 results ([github.com/rrwick/Metagenomics-Index-Correction](https://github.com/rrwick/Metagenomics-Index-Correction)) to be compatible with index generation by Centrifuge.<sup>5</sup>

105 We compared precomputed indices from NCBI RefSeq and the GTDB<sup>13</sup> to those we generated for dereplicated  
106 GTDB subsets, one that was manually curated<sup>4</sup> and one generated by thinspace. After assigning reads of at least  
107 150 bases to taxa, the Centrifuge output was filtered to above a quality score of 250. The biogas metagenomes  
108 are available from the European Nucleotide Archive (ENA) under the project accession PRJEB34573.

## 109 **Contributions**

110 AV designed and implemented the thinspace algorithm. AV, MH and CB designed the benchmark experiments. CB  
111 performed metagenomic sequencing. AV wrote the draft of this article, on which MH and CB provided extensive  
112 advice.

## 113 **Funding**

114 This study was partially funded by the German Research Foundation (DFG, BR 5692/1-1 and BR 5692/1-2). This  
115 study is part of the Collaborative Research Centre AquaDiva (CRC 1076 AquaDiva) of the Friedrich Schiller Univer-  
116 sity Jena, funded by the DFG. MH appreciates the support of the Joachim Herz Foundation by the add-on fellowship

117 for interdisciplinary life science. Metagenomic computations were kindly supported by Google Cloud Services. The  
118 authors are co-founders of and were supported by nanozoo GmbH in the development of this algorithm.

## 119 **References**

- 120 **1** Zhu, J. *et al. bioRxiv* 820365 (2019)
- 121 **2** Almeida, A. *et al. bioRxiv* 762682 (2019)
- 122 **3** Parks, D. H. *et al. Nat. Biotechnol.* 36, 996–1004 (2018)
- 123 **4** Parks, D. H. *et al. bioRxiv* 771964 (2019)
- 124 **5** Kim, D. *et al. Genome Res.* 26, 1721–1729 (2016)
- 125 **6** Olm, M. R. *et al. ISME J.* 11, 2864–2868 (2017)
- 126 **7** Evans, J. T. *et al. bioRxiv* 848176 (2019)
- 127 **8** Jain, C. *et al. Nat. Commun.* 9, 5114 (2018)
- 128 **9** Viehweger, A. *et al. bioRxiv* 524280 (2019)
- 129 **10** McInnes, L. *et al.* (2017)
- 130 **11** Gowanlock, M. in *Proceedings of the ACM international conference on supercomputing* 35–45 (ACM, 2019)
- 131 **12** Olm, M. R. *et al. bioRxiv* 647511 (2019)
- 132 **13** Méric, G. *et al. bioRxiv* 712166 (2019)
- 133 **14** Ondov, B. D. *et al. Genome Biol.* 17, 132 (2016)
- 134 **15** McInnes, L. *et al.* (2018)
- 135 **16** Rand, W. M. *J. Am. Stat. Assoc.* 66, 846–850 (1971)
- 136 **17** Vinh, N. X. *et al. J. Mach. Learn. Res.* 11, 2837–2854 (2010)
